# Supplementary material for: A three-microRNA panel in serum as novel biomarker for papillary thyroid carcinoma diagnosis
Source: PubMed Central journal article supplement — Chin Med J (Engl). 2020 Sep 30;133(21):2543–51. doi: 10.1097/CM9.0000000000001107 (PMC7722608; doi:10.1097/cm9.0000000000001107), 2020-09-30
Supplement: cm9-133-2543-s001.pdf [file cm9-133-2543-s001.pdf]

**Table 1. Differentially expressed miRNAs in the screening phase.**

| miRNA        | Fold change |        |           |
|--------------|-------------|--------|-----------|
|              | Pool 1      | Pool 2 | Mean fold |
| let-7b-5p    | 3.23        | 3.11   | 3.17      |
| miR-106a-5p  | 2.97        | 2.76   | 2.76      |
| miR-144-5p   | 4.15        | 1.80   | 2.97      |
| miR-15b-3p   | 3.36        | 2.25   | 2.80      |
| miR-17-5p    | 1.74        | 1.78   | 1.76      |
| miR-18a-5p   | 2.37        | 2.36   | 2.36      |
| miR-18b-5p   | 1.73        | 1.77   | 1.75      |
| miR-20a-5p   | 2.28        | 2.58   | 2.43      |
| miR-20b-5p   | 6.28        | 3.87   | 5.08      |
| miR-25-3p    | 4.08        | 2.97   | 3.52      |
| miR-296-5p   | 2.27        | 1.74   | 2.01      |
| miR-29b-2-5p | 4.24        | 2.98   | 3.61      |
| miR-324-3p   | 2.68        | 2.35   | 2.51      |
| miR-331-3p   | 2.81        | 1.86   | 2.33      |
| miR-451a     | 2.41        | 2.29   | 2.35      |
| miR-484      | 2.32        | 1.58   | 1.95      |
| miR-486-5p   | 4.75        | 2.33   | 3.54      |
| miR-500a-5p  | 2.68        | 2.68   | 2.68      |
| miR-574-3p   | 1.95        | 1.82   | 1.89      |
| miR-92a-3p   | 4.90        | 2.02   | 3.46      |
| miR-92b-3p   | 4.11        | 1.62   | 2.87      |
| miR-93-3p    | 4.51        | 2.40   | 3.46      |
| miR-93-5p    | 2.30        | 2.61   | 2.45      |
| miR-30b-5p   | 3.37        | 2.72   | 3.05      |
| miR-375      | 3.44        | 2.78   | 3.11      |
| miR-543      | 3.47        | 2.80   | 3.14      |
| miR-139-5p   | 3.68        | 2.20   | 2.94      |
| miR-150-5p   | 4.11        | 2.83   | 3.47      |
| miR-18a-3p   | 4.13        | 2.41   | 3.27      |
| miR-192-5p   | 4.57        | 1.80   | 3.19      |
| miR-151a-3p  | 4.77        | 3.85   | 4.31      |
| miR-200a-3p  | 5.19        | 4.19   | 4.69      |
| miR-485-3p   | 7.13        | 5.75   | 6.44      |
| miR-495-3p   | 7.20        | 5.81   | 6.51      |
| miR-16-2-3p  | 8.34        | 6.73   | 7.54      |
| miR-204-5p   | 10.38       | 8.37   | 9.38      |
| miR-142-5p   | -4.30       | -3.64  | -3.97     |
| miR-338-3p   | -4.62       | -2.85  | -3.73     |
| miR-33a-5p   | -8.01       | -13.51 | -10.76    |
| miR-424-5p   | -17.60      | -23.29 | -20.44    |

**Table 2. Expression levels of the identified miRNAs from screening phase but not passed through the training stage and the testing stage.**

| miRNA        | Training stage |            |      |                | Testing stage |            |      |                |
|--------------|----------------|------------|------|----------------|---------------|------------|------|----------------|
|              | Cases          | Controls   | FC   | <i>P</i> value | Cases         | Controls   | FC   | <i>P</i> value |
| let-7b-5p    | 4.22±1.69      | 5.57±1.78  | 2.56 | 0.003          | 4.38±0.89     | 4.93±0.67  | 1.46 | 0.100          |
| miR-150-5p   | 5.15±1.63      | 6.49±1.28  | 2.52 | <0.001         | 6.87±1.03     | 7.00±0.59  | 1.10 | 0.704          |
| miR-204-5p   | 4.18±1.41      | 5.05±1.67  | 1.82 | 0.031          | 9.08±1.32     | 9.78±1.52  | 1.62 | 0.140          |
| miR-485-3p   | 4.72±2.17      | 6.12±2.78  | 2.64 | 0.019          | 11.52±1.93    | 11.69±1.85 | 1.12 | 0.634          |
| miR-139-5p   | 0.58±1.78      | 1.78±1.48  | 2.30 | 0.001          | 9.59±0.94     | 9.47±0.73  | 0.92 | 0.410          |
| miR-200a-3p  | 5.10±1.62      | 6.32±1.78  | 2.33 | 0.005          | 7.08±0.87     | 7.44±0.71  | 1.28 | 0.067          |
| miR-20a-5p   | 6.31±1.44      | 7.99±1.22  | 3.20 | <0.001         | 11.00±1.75    | 11.54±1.49 | 1.46 | 0.227          |
| miR-92b-3p   | 1.75±1.61      | 2.78±2.54  | 2.05 | 0.049          | 5.33±0.76     | 5.38±0.78  | 1.04 | 0.590          |
| miR-93-5p    | -0.38±2.27     | 1.13±2.79  | 2.83 | 0.006          | 4.18±0.89     | 4.56±0.70  | 1.30 | 0.038          |
| miR-106a-5p  | 1.89±1.57      | 1.91±1.127 | 1.01 | 0.517          |               |            |      |                |
| miR-142-5p   | 5.36±2.10      | 6.04±1.82  | 1.60 | 0.081          |               |            |      |                |
| miR-144-5p   | 10.40±2.44     | 11.29±2.27 | 1.87 | 0.242          |               |            |      |                |
| miR-151a-3p  | 5.39±4.28      | 5.62±2.54  | 1.17 | 0.876          |               |            |      |                |
| miR-151a-5p  | 4.45±1.90      | 5.29±2.47  | 1.79 | 0.127          |               |            |      |                |
| miR-15b-3p   | 4.17±3.76      | 4.81±4.30  | 1.56 | 0.401          |               |            |      |                |
| miR-16-2-3p  | 8.09±2.45      | 8.98±1.91  | 1.86 | 0.143          |               |            |      |                |
| miR-17-5p    | 4.46±1.53      | 4.86±1.29  | 1.32 | 0.179          |               |            |      |                |
| miR-18a-3p   | 5.71±1.96      | 5.94±2.15  | 1.18 | 0.508          |               |            |      |                |
| miR-18a-5p   | 6.86±4.01      | 7.95±4.55  | 2.13 | 0.092          |               |            |      |                |
| miR-18b-5p   | 8.75±2.06      | 9.23±2.00  | 1.39 | 0.212          |               |            |      |                |
| miR-190a     | 9.71±2.24      | 10.66±2.11 | 1.93 | 0.183          |               |            |      |                |
| miR-192-5p   | 1.03±1.06      | 1.04±1.30  | 1.01 | 0.914          |               |            |      |                |
| miR-20b-5p   | 2.54±1.79      | 2.49±2.15  | 0.96 | 0.764          |               |            |      |                |
| miR-222-3p   | -0.72±2.14     | 0.08±2.34  | 1.74 | 0.077          |               |            |      |                |
| miR-29b-2-5p | 6.58±4.01      | 7.30±4.67  | 1.65 | 0.341          |               |            |      |                |
| miR-30b-5p   | 3.28±4.32      | 4.06±4.67  | 1.72 | 0.143          |               |            |      |                |
| miR-324-3p   | 3.61±4.24      | 4.68±4.29  | 2.10 | 0.103          |               |            |      |                |
| miR-331-3p   | 9.13±3.06      | 9.96±3.71  | 1.79 | 0.081          |               |            |      |                |
| miR-338-3p   | 7.24±4.13      | 7.84±4.51  | 1.52 | 0.408          |               |            |      |                |
| miR-33a-5p   | 3.64±2.98      | 4.27±3.60  | 1.54 | 0.401          |               |            |      |                |
| miR-375      | 2.53±4.11      | 3.34±4.38  | 1.75 | 0.157          |               |            |      |                |
| miR-424-5p   | 5.83±3.68      | 6.41±4.38  | 1.50 | 0.259          |               |            |      |                |
| miR-451a     | 3.02±4.14      | 3.57±3.84  | 1.47 | 0.421          |               |            |      |                |
| miR-484      | 1.14±4.10      | 1.55±4.23  | 1.33 | 0.302          |               |            |      |                |
| miR-486-5p   | -3.26±2.52     | -2.26±2.64 | 1.99 | 0.171          |               |            |      |                |
| miR-495-3p   | 0.77±1.39      | 1.58±2.10  | 1.76 | 0.105          |               |            |      |                |
| miR-500a-5p  | 6.63±4.03      | 6.96±4.73  | 1.25 | 0.524          |               |            |      |                |
| miR-543      | 6.55±3.82      | 7.29±4.46  | 1.67 | 0.127          |               |            |      |                |
| miR-574-3p   | -6.33±2.39     | -5.62±2.86 | 1.63 | 0.199          |               |            |      |                |
| miR-93-3p    | 8.25±1.82      | 8.35±2.47  | 1.07 | 0.308          |               |            |      |                |

miR-95-5p 7.33±1.06 8.10±4.62 1.71 0.271

Data are presented as median ± standard deviation; FC: Fold change.

**Table 3. Expression levels of the three miRNAs in the external cohort.**

| miRNA      | Cases     | Controls  | FC   | P value |
|------------|-----------|-----------|------|---------|
| miR-25-3p  | 1.68±1.67 | 2.95±0.58 | 2.40 | 0.037   |
| miR-296-5p | 2.24±1.37 | 3.36±0.63 | 2.18 | 0.044   |
| miR-92a-3p | 6.91±0.87 | 7.90±0.92 | 1.99 | 0.019   |

Data are presented as median ± standard deviation; FC: Fold change.

**Table 4. Differentially expressed miRNAs in the 2 NG pools and 1 HC pool.**

| miRNA       | Fold change |        |           |
|-------------|-------------|--------|-----------|
|             | Pool 1      | Pool 2 | Mean fold |
| miR-375     | 5.94        | 1.53   | 3.74      |
| miR-16-5p   | 3.60        | 1.80   | 2.70      |
| miR-483-5p  | 1.71        | 3.36   | 2.54      |
| miR-144-3p  | 2.57        | 1.83   | 2.20      |
| miR-501-3p  | 1.76        | 2.39   | 2.07      |
| miR-885-5p  | 1.62        | 2.40   | 2.01      |
| miR-33a-5p  | 2.28        | 1.69   | 1.98      |
| miR-324-3p  | 2.13        | 1.70   | 1.91      |
| miR-150-5p  | 1.54        | 1.57   | 1.56      |
| miR-454-3p  | -1.81       | -1.95  | -1.88     |
| let-7e-5p   | -2.20       | -1.70  | -1.95     |
| miR-423-3p  | -1.90       | -2.04  | -1.97     |
| miR-339-5p  | -1.80       | -2.48  | -2.14     |
| miR-27b-3p  | -1.81       | -2.74  | -2.27     |
| miR-30b-5p  | -1.97       | -2.64  | -2.31     |
| miR-301a-3p | -2.73       | -2.07  | -2.40     |
| miR-30e-3p  | -1.93       | -2.88  | -2.41     |
| miR-103a-3p | -2.13       | -2.83  | -2.48     |
| let-7a-5p   | -1.94       | -3.07  | -2.50     |
| miR-221-3p  | -1.72       | -3.40  | -2.56     |
| miR-151a-5p | -1.82       | -3.35  | -2.59     |
| miR-26a-5p  | -1.89       | -3.30  | -2.59     |
| miR-23b-3p  | -2.41       | -2.90  | -2.65     |
| miR-223-5p  | -1.85       | -3.52  | -2.68     |
| miR-376a-3p | -1.72       | -3.75  | -2.73     |
| miR-27a-3p  | -2.17       | -3.35  | -2.76     |
| let-7f-5p   | -1.82       | -3.90  | -2.86     |
| miR-199a-3p | -1.94       | -3.80  | -2.87     |

|                    |        |        |        |
|--------------------|--------|--------|--------|
| <b>miR-133a-3p</b> | -2.31  | -3.50  | -2.91  |
| <b>miR-485-3p</b>  | -1.89  | -4.03  | -2.96  |
| <b>miR-146b-5p</b> | -2.12  | -3.92  | -3.02  |
| <b>miR-495-3p</b>  | -2.48  | -3.57  | -3.03  |
| <b>miR-199a-5p</b> | -1.98  | -4.09  | -3.04  |
| <b>miR-28-5p</b>   | -2.52  | -3.82  | -3.17  |
| <b>miR-181a-5p</b> | -2.85  | -3.54  | -3.19  |
| <b>miR-143-3p</b>  | -2.47  | -4.37  | -3.42  |
| <b>miR-326</b>     | -3.01  | -3.84  | -3.42  |
| <b>miR-30c-5p</b>  | -2.13  | -4.79  | -3.46  |
| <b>let-7d-5p</b>   | -2.42  | -4.51  | -3.47  |
| <b>miR-374b-5p</b> | -2.43  | -5.28  | -3.86  |
| <b>miR-223-3p</b>  | -2.29  | -5.97  | -4.13  |
| <b>miR-155-5p</b>  | -4.07  | -4.30  | -4.18  |
| <b>miR-766-3p</b>  | -2.59  | -5.94  | -4.27  |
| <b>miR-382-5p</b>  | -2.79  | -6.07  | -4.43  |
| <b>miR-195-5p</b>  | -3.62  | -5.97  | -4.80  |
| <b>miR-154-5p</b>  | -4.33  | -7.58  | -5.96  |
| <b>miR-133b</b>    | -4.39  | -10.92 | -7.66  |
| <b>miR-136-5p</b>  | -5.34  | -10.63 | -7.99  |
| <b>miR-127-3p</b>  | -9.89  | -7.61  | -8.75  |
| <b>miR-200c-3p</b> | -12.48 | -10.64 | -11.56 |
| <b>miR-543</b>     | -11.96 | -12.07 | -12.02 |

NG: Nodular goiter; HC: Healthy control.
