# Supplementary material for: A three-microRNA panel in serum as novel biomarker for papillary thyroid carcinoma diagnosis
Source: PubMed Central journal article supplement — Chin Med J (Engl). 2020 Sep 30;133(21):2543–51. doi: 10.1097/CM9.0000000000001107 (PMC7722608; doi:10.1097/cm9.0000000000001107), 2020-09-30

**Figure 1** Receiver-operating characteristic (ROC) curves of the three miRNAs to discriminate papillary thyroid carcinoma patients from healthy controls. (A) miR-25-3p: AUC = 0.623, 95% CI: 0.542–0.704,  $P = 0.038$ ; (B) miR-296-5p: AUC = 0.621, 95% CI: 0.540–0.703,  $P = 0.039$ ; (C) miR-92a-3p: AUC = 0.702, 95% CI: 0.626–0.778,  $P = 0.037$ .

AUC: Areas under the curve; CI: Confidence interval.

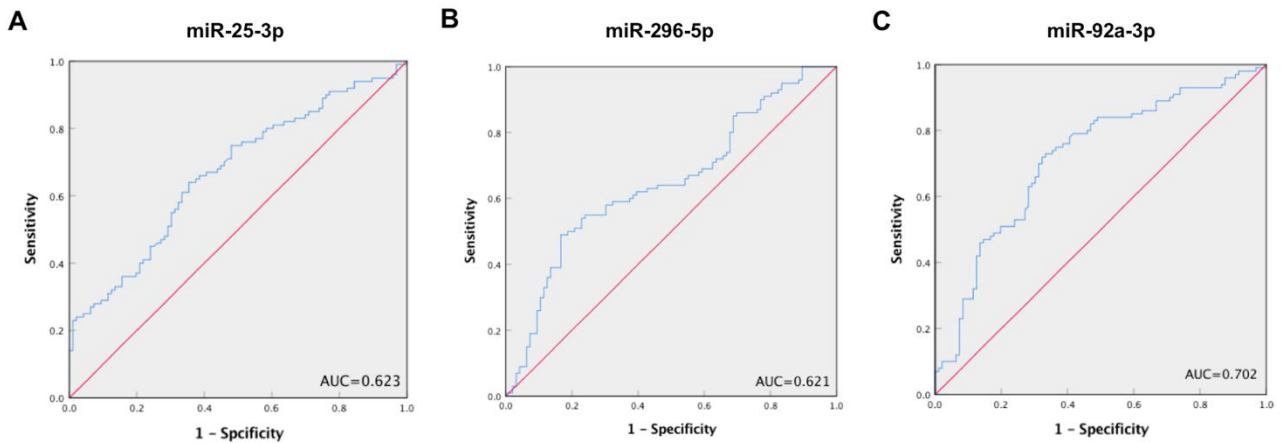

**Figure 2.** Comparison of the expression levels of the identified miRNAs between PTC patients and NGs. Horizontal line: Mean with 95% confidence interval. (A) miR-25-3p:  $*P = 0.007$ ,  $Z = -2.636$ ; (B) miR-296-5p:  $† P < 0.001$ ,  $Z = -4.757$ ; (C) miR-92a-3p:  $‡ P = 0.001$ ,  $Z = -3.295$ .

PTC: Papillary thyroid carcinoma; NG: Nodular goiter.

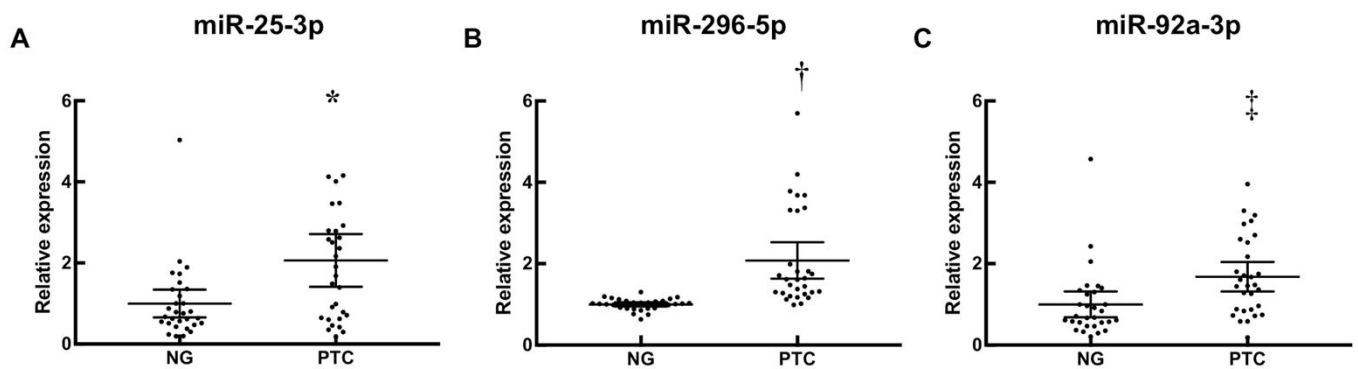

**Figure 3** Receiver-operating characteristic (ROC) curve analysis of the three-miRNA panel to differentiate papillary thyroid carcinoma (PTC) patients from patients with nodular goiter (NG). AUC = 0.969, 95% confidence interval: 0.927–1.000,  $P = 0.021$ . AUC: Areas under the curve.

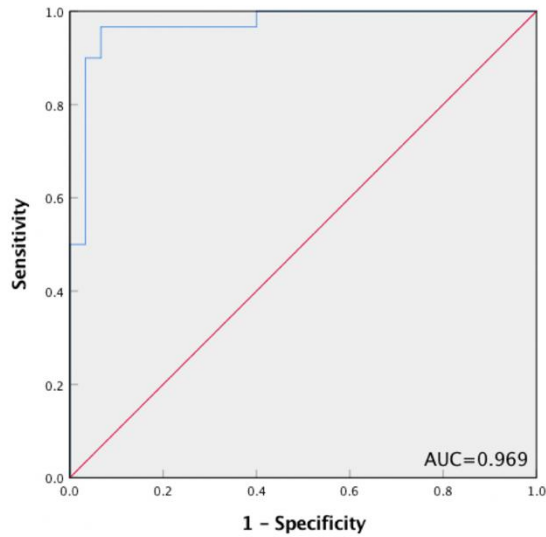

**Figure 4** The Cancer Genome Atlas (TCGA) miRNA sequencing data of 59 pairs of tumor tissues and the matched normal tissues. (A) miR-25:  $*P < 0.001$ ,  $Z = -4.286$ ; (B) miR-296:  $† P < 0.001$ ,  $Z = -3.527$ ; (C) miR-92a-1:  $‡ P = 0.251$ ,  $Z = -0.095$ ; (D) miR-92a-2:  $§ P = 0.234$ ,  $Z = -0.106$ . RPKM: Reads Per Kilobase per Million.

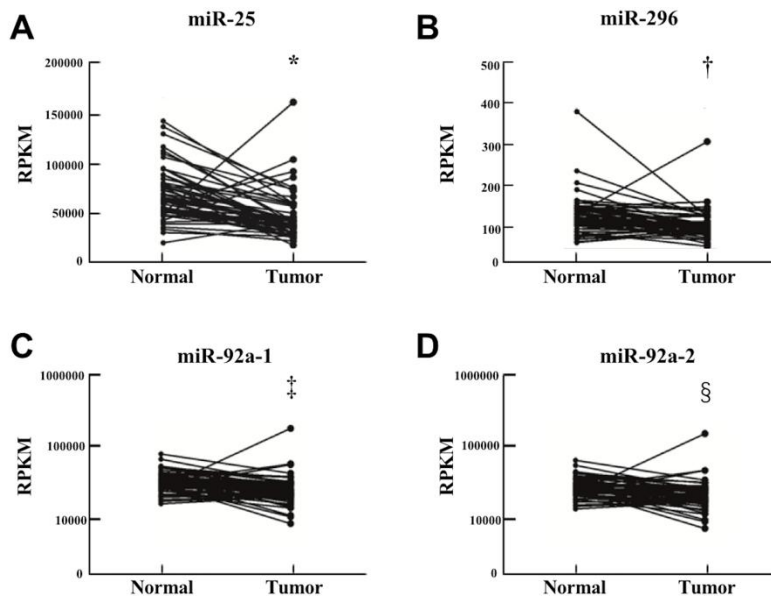

Supplement: cm9-133-2543-s002.pdf [file cm9-133-2543-s002.pdf]
